# Supplementary material
Source: PubMed Central journal article supplement (PMC4461328)

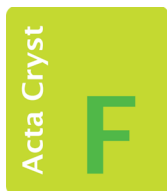

STRUCTURAL BIOLOGY  
COMMUNICATIONS

**Volume 71 (2015)**

**Supporting information for article:**

**Overexpression, purification, crystallization and preliminary  
X-ray diffraction of the nisin resistance protein from  
*Streptococcus agalactiae***

**Sakshi Khosa, Astrid Hoepfner, Diana Kleinschrodt and Sander H. J.  
Smits**

### Mass Spectrometry Analysis

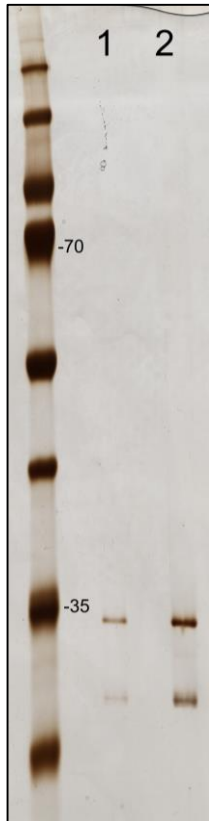

Lanes 1 and 2: NSR30 protein crystals.

|                  | 30kDa Semitryptic                                               | 30kDa Tryptic                                                   | 35kDa Semitryptic                                               | 35kDa Tryptic                                                   |
|------------------|-----------------------------------------------------------------|-----------------------------------------------------------------|-----------------------------------------------------------------|-----------------------------------------------------------------|
| Accession        | P0000X                                                          | P0000X                                                          | P0000X                                                          | P0000X                                                          |
| Description      | NSR30 OS=S agalactiae GN=NSR30 PE=1 SV=1 - [NSR30_S_AGALACTIAE] | NSR30 OS=S agalactiae GN=NSR30 PE=1 SV=1 - [NSR30_S_AGALACTIAE] | NSR30 OS=S agalactiae GN=NSR30 PE=1 SV=1 - [NSR30_S_AGALACTIAE] | NSR30 OS=S agalactiae GN=NSR30 PE=1 SV=1 - [NSR30_S_AGALACTIAE] |
| Score            | 2985.39                                                         | 2619.54                                                         | 3427.80                                                         | 3160.60                                                         |
| Coverage         | 49.68                                                           | 49.36                                                           | 59.29                                                           | 46.15                                                           |
| #Proteins        | 1                                                               | 1                                                               | 1                                                               | 1                                                               |
| #Unique Peptides | 22                                                              | 11                                                              | 36                                                              | 13                                                              |
| #Peptides        | 22                                                              | 11                                                              | 36                                                              | 13                                                              |
| #PSMs            | 75                                                              | 58                                                              | 94                                                              | 78                                                              |
| #AAs             | 312                                                             | 312                                                             | 312                                                             | 312                                                             |
| MW (kDa)         | 35.4                                                            | 35.4                                                            | 35.4                                                            | 35.4                                                            |
| Calc. pI         | 9.91                                                            | 9.91                                                            | 9.91                                                            | 9.91                                                            |

Sequence Coverage 30kDa band with Semitrypsin:

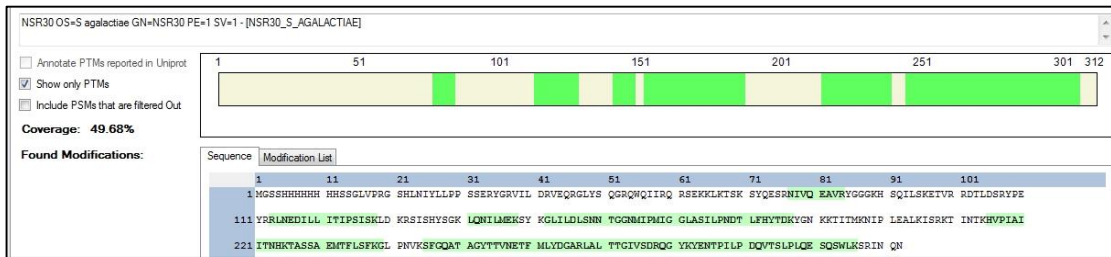

Sequence Coverage 30kDa band with Trypsin:

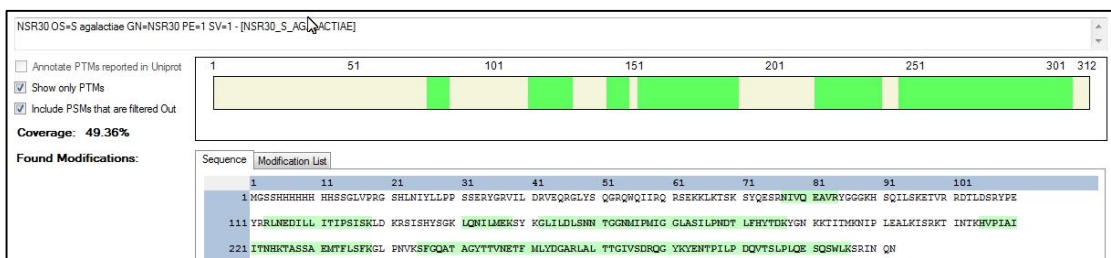

Sequence Coverage 35kDa band with Semitrypsin:

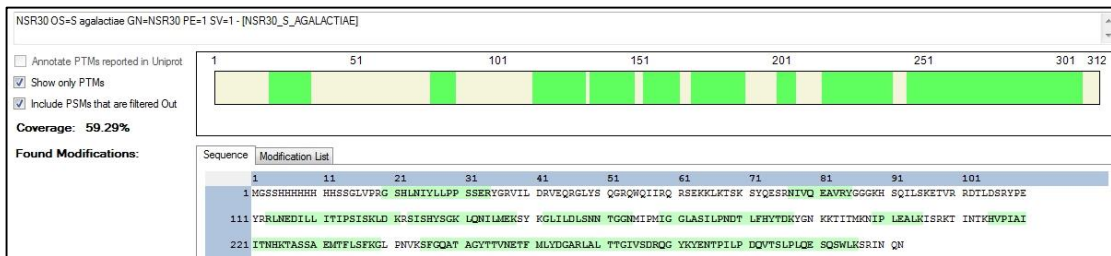

Sequence Coverage 35kDa band with Trypsin:

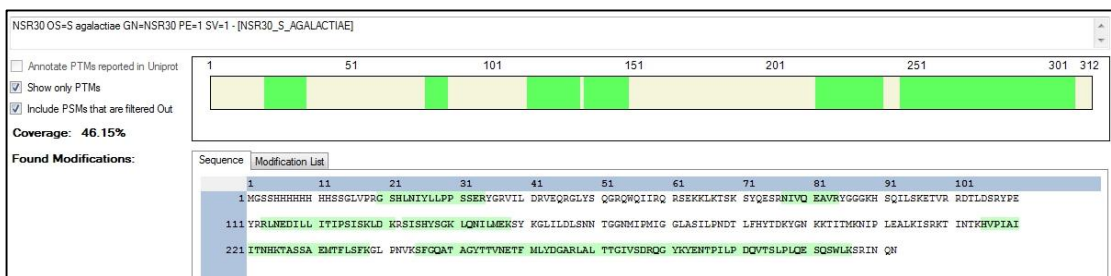

Supplement: f-71-00671-sup1.pdf [file f-71-00671-sup1.pdf]
